# The response of shrimp fisheries to climate variability off Baja California, México

Eduardo Santamaría-del-Ángel<sup>1\*</sup>, Roberto Millán-Núñez<sup>1</sup>, Adriana González-Silvera<sup>1</sup>, Mariana Callejas-Jiménez<sup>1</sup>, Ramón Cajal-Medrano<sup>1</sup>, and Manuel S. Galindo-Bect<sup>2</sup>

<sup>1</sup>Facultad de Ciencias Marinas, Universidad Autónoma de Baja California México, Km 106, Carretera Tijuana-Ensenada Ensenada, Baja California, México

<sup>2</sup>Instituto de investigaciones Oceanológicas, Universidad Autónoma de Baja California México, Km 106, Carretera Tijuana-Ensenada Ensenada, Baja California, México

\*Corresponding Author: tel: +52 646 1744905; fax: +52 646 1744103; e-mail: [santamaria@uabc.edu.mx](mailto:santamaria@uabc.edu.mx) or [eduardo.santamaria@gmail.com](mailto:eduardo.santamaria@gmail.com).

Santamaría-del-Ángel, E., Millán-Núñez, R., González-Silvera, A., Callejas-Jiménez, M., Cajal-Medrano, R., and Galindo-Bect, M. S. 2011. The response of shrimp fisheries to climate variability off Baja California, México. – ICES Journal of Marine Science, 68: 766–772.

Received 11 February 2010; accepted 3 October 2010; advance access publication 22 December 2010.

The effect of climate variability on the shrimp fishery in the upper Gulf of California and the west coast of southern Baja California was investigated using artisanal and industrial catches of blue shrimp (*Litopenaeus stylirostris*) and brown shrimp (*Farfantepenaeus californiensis*). Catch data were compared with the Southern Oscillation Index (SOI) and remotely sensed environmental parameters, including sea surface temperature, chlorophyll *a*, coloured dissolved organic matter, and particulate organic carbon (Rrs412 and Rrs490). Overall, temperature was the best environmental indicator of commercial shrimp catches. Catches of blue shrimp varied directly and of brown shrimp indirectly with the SOI in their dominant areas, suggesting that the two species are influenced by *El Niño* conditions in different ways.

**Keywords:** AVHRR, Baja California, blue and brown shrimp, climate variability, *El Niño*, SeaWiFS.

## Introduction

The abundance of species with short life cycles, such as anchovy (family Engraulidae), sardine (family Clupeidae), and shrimp, are often influenced by environmental factors, increasing their vulnerability when fishing and environmental effects coincide. Changes in environmental conditions can affect recruitment success, resulting in variable year-class strength that affects the fishery directly (Aragón-Noriega, 2007). Consequently, environmental variability should be an important consideration in management strategies for such species. The purpose of this study was to determine the association between environmental parameters and shrimp catches off San Felipe (SF) in the upper Gulf of California and off the west coast of southern Baja California (WCSBC).

The Mexican shrimp fishery has been important commercially since the 1950s; the catch in 2004 was 58 000 t, worth US\$24 m (FAO, 2006a, b), with the Gulf of California producing the largest portion of the catch (SAGARPA, 2009). The main species caught are blue (*Litopenaeus stylirostris*), brown (*Farfantepenaeus californiensis*), white (*L. vannamei*), and crystal shrimp (*F. brevirostris*). There are two fishing sectors, artisanal and industrial (SAGARPA, 2009). The artisanal fishery is conducted by unions, cooperatives, or independent fishers using small (6–9 m long, 55–100 hp) boats and trawls in shallow coastal waters. The industrial fishery is typically conducted with larger (18–25 m, 240–624 hp) boats in both shallow and deeper water by large fishing companies (Gillett, 2008). Note that the term industrial is used

here to identify the non-artisanal fishery and that it should not be confused with so-called “industrial” fishmeal fisheries.

The upper Gulf of California is an area with high levels of primary productivity, which is reflected in higher trophic levels (Millán-Núñez *et al.*, 1999). Environmental variability has previously been studied in the area using satellite data (Santamaría-del-Ángel *et al.*, 1994a, b; Flores-de-Santiago *et al.*, 2007; López-Calderón *et al.*, 2008), but there have been no studies of primary productivity for the WCSBC, and only a few physical studies examining vertical mixing and its effect on nutrient transport and primary productivity (Durazo, 2009) have been done. In addition, there have been no *in situ* biological studies of shrimp in the area. Nevertheless, considering the low trophic level of shrimp and the likely strong influence of environmental factors on their growth (Glantz, 1992), reproduction, and recruitment, an investigation of the relationship between shrimp catches and relevant remotely sensed environmental factors could result in a predictive capability that could be useful in fishery management.

## Material and methods

Annual catches of blue and brown shrimp off SF and in the WCSBC were obtained from annual reports of the Mexican Secretary of Fisheries (Secretaría de Pesca, 1986, 1987, 1988, 1989) and the Secretary of Agriculture, Livestock, Rural Development, Fisheries and Food (SAGARPA, 2002, 2003, 2004a, b, c, d, 2005, 2006a, b, 2007, 2008, 2009). The study area and locations of the SF and the WCSBC shrimp fishery areas are shown in Figure 1.

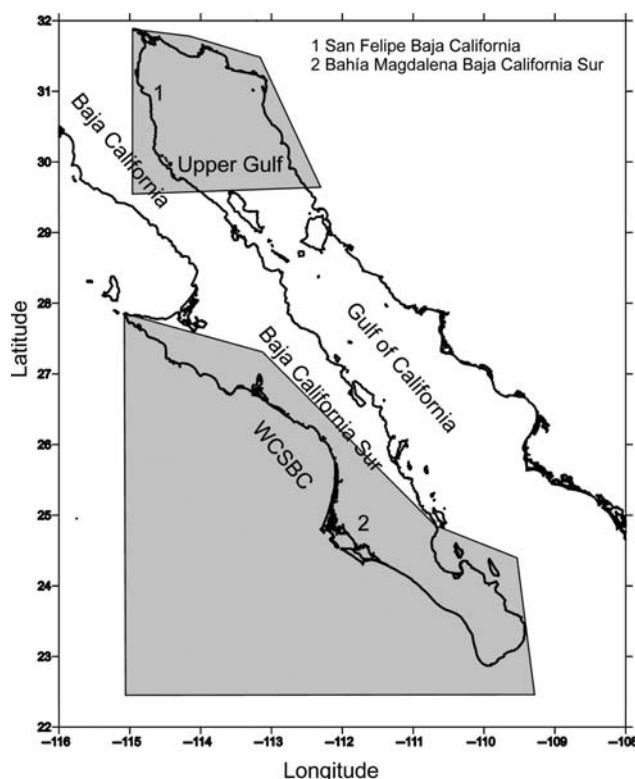

**Figure 1.** Gulf of California, with fishing areas of the upper Gulf of Baja California and the west coast of southern California (WCSBC) highlighted in grey.

**Table 1.** Principal component analyses for SF Baja California and the WCSBC, with for each area the results of the eigenanalysis and the Pearson's correlation coefficients.

| SF parameter                                             | PC1           | PC2          | PC3           |
|----------------------------------------------------------|---------------|--------------|---------------|
| Eigenvalue                                               | 4.147         | 2.163        | 1.269         |
| Proportion of the total variability explained by each PC | 0.461         | 0.240        | 0.141         |
| Cumulative total variability explained by cumulative PC  | 0.461         | 0.701        | 0.842         |
| Parameter                                                | Comp. 1       | Comp. 2      | Comp. 3       |
| Total                                                    | 0.168         | <b>0.904</b> | -0.102        |
| Industrial                                               | -0.567        | 0.185        | <b>-0.766</b> |
| Artisanal                                                | 0.399         | <b>0.800</b> | 0.220         |
| SST                                                      | -0.057        | <b>0.595</b> | 0.251         |
| CDOM                                                     | <b>0.649</b>  | 0.071        | -0.681        |
| Chl <i>a</i>                                             | <b>0.900</b>  | -0.290       | 0.003         |
| POC                                                      | <b>0.797</b>  | -0.398       | 0.291         |
| Rrs412                                                   | <b>-0.973</b> | 0.172        | 0.062         |
| Rrs490                                                   | <b>-0.903</b> | -0.195       | 0.089         |
| WCSBC parameter                                          | PC1           | PC2          |               |
| Eigenvalue                                               | 6.244         | 1.409        |               |
| Proportion of the total variability explained by each PC | 0.694         | 0.157        |               |
| Cumulative total variability explained by cumulative PC  | 0.694         | 0.850        |               |
| Parameter                                                | Comp. 1       | Comp. 2      |               |
| Total                                                    | <b>-0.800</b> | -0.610       |               |
| Industrial                                               | <b>-0.654</b> | 0.117        |               |

Continued

**Table 1.** Continued

|              |               |        |
|--------------|---------------|--------|
| Artisanal    | <b>-0.714</b> | -0.700 |
| SST          | <b>-0.721</b> | -0.483 |
| CDOM         | <b>0.942</b>  | 0.095  |
| Chl <i>a</i> | <b>0.852</b>  | -0.408 |
| POC          | <b>0.924</b>  | -0.216 |
| Rrs412       | <b>-0.940</b> | 0.157  |
| Rrs490       | <b>-0.887</b> | 0.264  |

The most significant correlation coefficients are shown emboldened (alpha 5% is 0.514 for SF Baja California and 0.602 for the WCSBC).

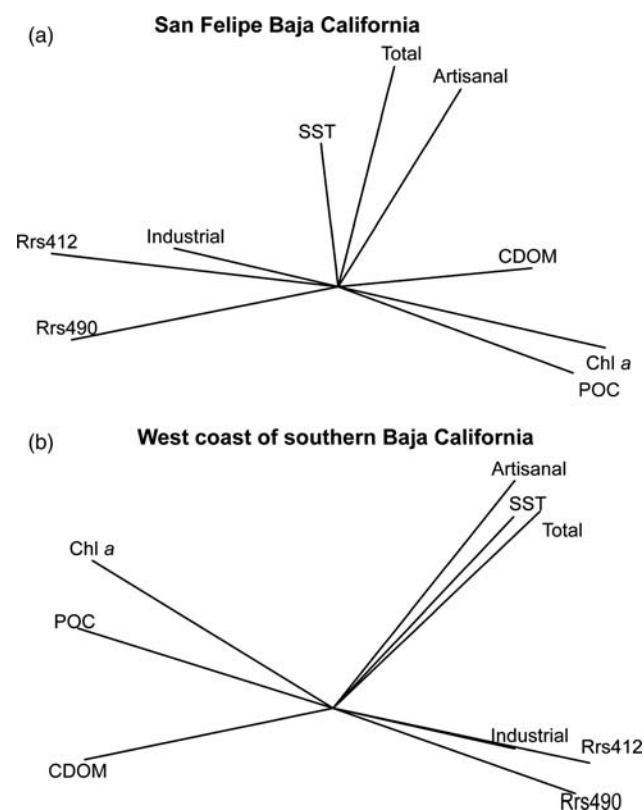

**Figure 2.** Vector graphics from factor analysis between shrimp catches and environmental indices from remote-sensing data in (a) SF Baja California; and (b) the WCSBC.

Owing to differences in the level of reporting over time and resulting analytical limitations, catch data were aggregated for analysis as follows: (i) species combined; (ii) separated by area and fishing sector, i.e. total catch (1985–2008); (iii) industrial and artisanal catches (1994–2008); and (iv) fishing sectors combined, separated by species, 1985–2001 for SF, and 1986–2008 for WCSBC.

Remotely sensed indicators of the environment included sea surface temperature (SST) derived from Advanced Very High Resolution Radiometer (AVHRR) data, using the Pathfinder algorithm version 5, and chlorophyll *a* (Chl *a*) concentration, coloured dissolved organic matter (CDOM), particulate organic carbon (POC), and remote-sensing reflectance at 412 nm (Rrs412) and 490 nm (Rrs490) obtained from SeaWiFS (Sea-viewing Wide Field-of-view Sensor), using the standard algorithms (O'Reilly *et al.*, 2000; Patt *et al.*, 2003; Stramska and Stramski, 2005; Mannino *et al.*, 2008; Djavidnia *et al.*, 2010). Annual geometric

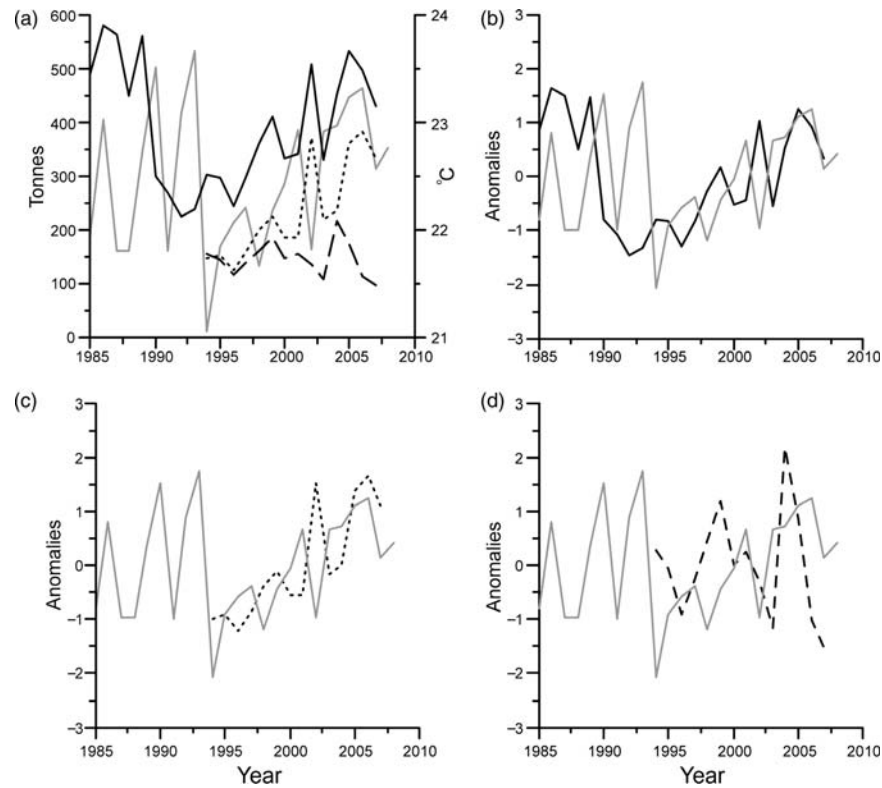

**Figure 3.** SF Baja California: (a) SST (grey), total catch (black), artisanal catch (dotted), and industrial catch (dashed); (b) SST (grey) and total catch anomalies (black); (c) SST (grey) and artisanal catch anomalies (dotted); and (d) SST (grey) and industrial catch anomalies (dashed).

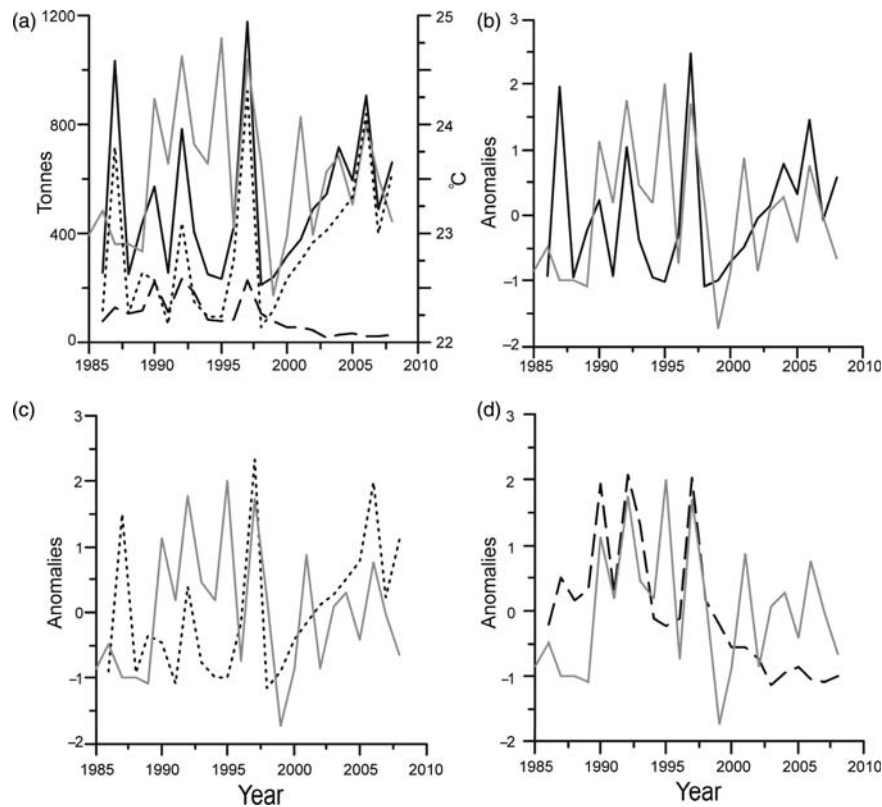

**Figure 4.** WCSBC : (a) SST (grey), total (black), artisanal (dotted), and industrial catch (dashed); (b) SST (grey) and total catch anomalies (black); (c) SST (grey) and artisanal catch anomalies (dotted); and (d) SST (grey) and industrial catch anomalies (dashed).

averages were calculated for each region (Figure 1) for images with a pixel size of  $9 \times 9$  km. Anomalies were calculated and standardized using the Z-transformation (datapoint minus the average, divided by the standard deviation).

Principal component and factor analyses were conducted to determine relationships between catches and environmental indicators. Cross-correlation analysis was used to examine possible time-lags between catches and SST. Finally, a trend analysis was conducted based on the slope ( $b_1$ ) of a simple linear regression model using catch and SST as dependent variables, and years as the independent variable (1994–2007 for SF, 1994–2008 for WCSBC).

**Table 2.** Trend analysis for SF Baja California and the WCSBC based on the slope ( $b_1$ ) of a simple linear regression model using catches and SST as dependent variables and years as the independent variable.

| Parameter  | SF           |             | WCSBC        |              |
|------------|--------------|-------------|--------------|--------------|
| g.l.       | 12           |             | 13           |              |
| $t_{crit}$ | 2.178        |             | 2.160        |              |
| Year       | 1994–2007    |             | 1994–2008    |              |
| Alpha 5%   | $b_1$        | $t_{cal}$   | $b_1$        | $t_{cal}$    |
| Total      | <b>17</b>    | <b>4.32</b> | 24.1         | 1.55         |
| Industrial | –0.094       | –0.043      | <b>–7.84</b> | <b>–3.13</b> |
| Artisanal  | <b>17.9</b>  | <b>5.27</b> | <b>30.8</b>  | <b>2.21</b>  |
| SST        | <b>0.126</b> | <b>4.65</b> | –0.034       | –0.90        |

Emboldened numbers indicate significant slopes (i.e. greater than  $t_{crit}$ ).

Annual averages of the Southern Oscillation Index (SOI) were calculated using monthly data available at <http://www.bom.gov.au/climate/current/soi2.shtml>.

## Results

For SF, the principal component analysis (Table 1) displayed three components (eigenvalues  $> 1$ ) that explained 84.2% of the cumulative total variability of the catch (all species). The total catch and the artisanal catch were directly related to SST (PC2), whereas the industrial catch was not associated with any variable (PC3). There were two principal components for WCSBC (Table 1), explaining 85% of the total variability. All variables were associated with the first component (the highest correlation coefficients were obtained for this component). Total, artisanal, and industrial catches were all directly related to SST, Rrs412, and Rrs490, and inversely related to CDOM, Chl  $a$ , and POC (Table 1, Figure 2b). Factor analysis confirmed these results (Figure 2), particularly the relationship between total and artisanal catches and SST in both areas. As observed off SF, the total catch in the WCSBC was mostly made up of artisanal catches (Table 1, Figure 2b).

Time-series plots (Figures 3 and 4) also reflected the direct relationship between SST and shrimp catches in both areas. Trend analysis (Table 2) indicated a significant increasing trend in artisanal catches since the mid-1990s in both areas. However, SSTs increased significantly only off SF and displayed no trend in the WCSBC. Industrial catches in the WCSBC declined

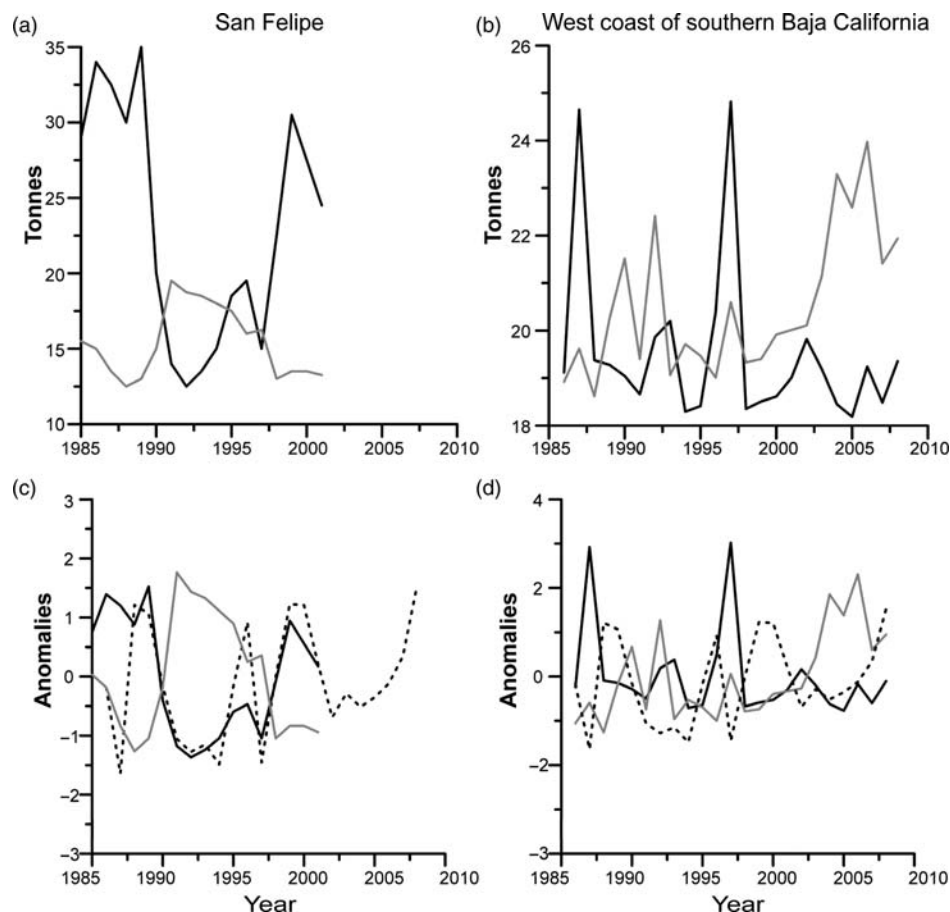

**Figure 5.** Blue (black line) and brown shrimp (grey line) catches for (a) SF Baja California, (b) WCSBC. Anomalies for annual SOI (dotted line) and blue (black line) and brown (grey line) shrimp catches for (c) SF Baja California, and (d) WCSBC.



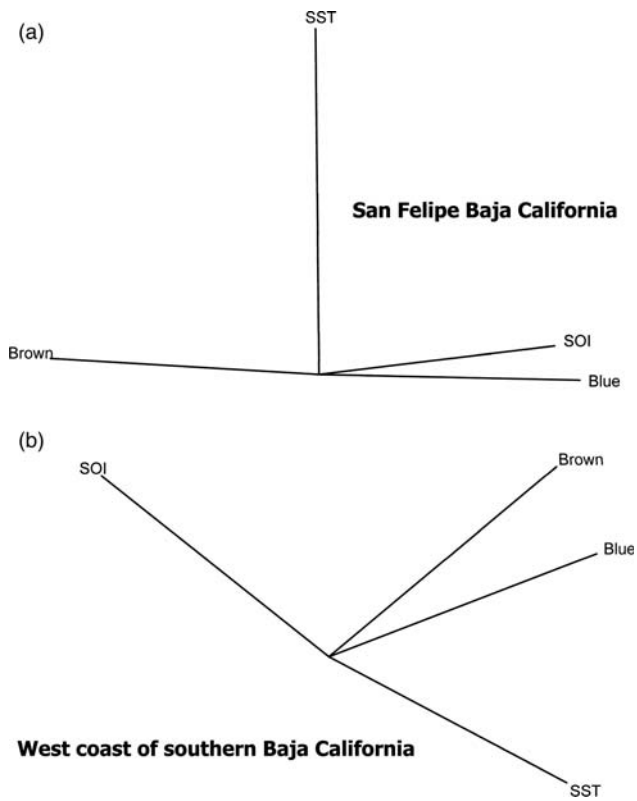

**Figure 6.** Vector graphics from factor analysis for (a) SF Baja California, and (b) WCSBC.

notably from the mid-1990s. The maximum positive linear correlation between SST and catch was with a 1-year time-lag (total catch,  $r = 0.737$ ; artisanal catch,  $r = 0.766$ ) off SF. The artisanal catch dominated the total catch in both areas (Figures 3a and 4a). Note also that temperatures in the WCSBC averaged  $\sim 2^\circ\text{C}$  higher than off SF.

For species, time-series plots indicate that blue shrimp tended to dominate catches off SF, whereas brown shrimp dominated in the WCSBC (Figure 5a and b). Off SF, catches of the two species appeared to be inversely related to each other (Figure 5a,  $r = -0.834$ ), whereas there was no clear pattern for the WCSBC. Blue shrimp appeared to vary positively and brown shrimp negatively with the annual SOI (Figure 5c), but this pattern was also less clear in the WCSBC. Factor analysis (Figure 6a) for SF data confirmed that the association with the SOI was positive for blue and negative for brown shrimp and that catches of the two species were negatively correlated. The same analysis for the WCSBC (Figure 6b) shows the negative relationship between SST and the SOI.

Two *El Niño* events during the study period (1992/1993 and 2002/2003) exhibited the typical negative SOI and positive SST anomalies (Figure 7).

## Discussion

The analysis was complicated by changes in the level of catch reporting over time and the unavailability of effort data for calculating catch per unit effort. The latter precludes any conclusions being drawn pertaining to environmentally caused changes in abundance. In addition, management measures changed during

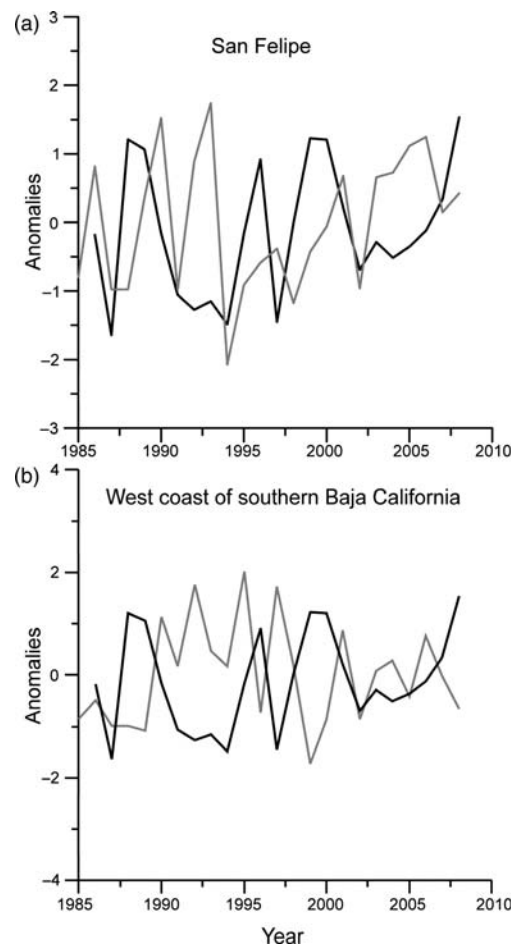

**Figure 7.** SOI (black) and SST anomalies (grey) for (a) SF Baja California, and (b) WCSBC.

the study period. In particular, the establishment of the Biosphere Reserve of the Upper Gulf of California and Colorado River Delta, which excluded most industrial fishing from the upper Gulf after 1993 (García-Juárez *et al.*, 2009), contributed to the dominance of artisanal catches off SF.

Despite those data limitations, the results suggest strong environmental influences on shrimp catches in both study areas, perhaps reflecting changes in shrimp abundance and hence their availability to the fishery. There was a strong association between catches and SST. Most relationships were without time-lags, but one suggested that warmer years yielded better catches the following year. Because of the lack of *in situ* biological information, the mechanisms underlying this relationship are obscure, although Aragón-Noriega (2007) suggests that warmer temperatures allow reproduction over a longer period. Our results are similar to those of Li and Clarke (2005) for brown shrimp in the Gulf of Mexico and by González-Yañez and Ortiz-Bultó (2002) for pink shrimp in Cuba.

In this study, the catches of brown and blue shrimp off SF exhibited opposite patterns relative to the SOI, suggesting that *El Niño* conditions favour brown shrimp and non-*El Niño* conditions favour blue shrimp. However, the relationships are complex and influenced by other factors. For example, Galindo-Bect (2003) reported opposing results for blue shrimp catches off SF relative to *El Niño*. The upper Gulf is influenced by discharge from the

Colorado River, whose delta has high nutrient concentrations (Hernández-Ayón *et al.*, 1993), turbidity (Santamaría-del-Ángel *et al.*, 1996), and primary productivity (Millán-Núñez *et al.*, 1999). Increases in discharge should increase nutrients and productivity, including that of the shrimp population (Galindo-Bect *et al.*, 2000).

There were no significant relationships between shrimp catch and remotely sensed spectroradiometric products (Chl *a*, POC, CDOM, Rrs412, Rrs490). One would expect a functional relationship between Chl *a* and survival of planktonic larvae, but this might not necessarily have been reflected in commercial catches during the relatively short period when satellite data were available. A longer time-series will likely be required to explore further the patterns observed and to develop predictive population models that include environmental parameters.

## Acknowledgements

Eduardo Santamaría-del-Ángel and Mariana Callejas-Jimenez were supported by the programme Societal Application in Fisheries and Aquaculture using Remotely-sensed Imagery (SAFARI) and the Universidad Autónoma de Baja California. We are very grateful to the Guest Editor for his thorough review and improvement of an early version of this manuscript. We also appreciate the comments and suggestions of two anonymous reviewers.

## References

- Aragón-Noriega, E. A. 2007. Coupling the reproductive period of blue shrimp *Litopenaeus stylirostris* Stimpson, 1874 (Decapoda: Penaeidae) with sea surface temperature in the Gulf of California. *Journal of Marine Biology and Oceanography*, 42: 167–175.
- Djavidnia, S., Mélin, F., and Hoepffner, N. 2010. Comparison of global ocean colour data records. *Ocean Science*, 6: 61–76.
- Durazo, R. 2009. Climate and upper ocean variability off Baja California, Mexico, 1997–2008. *Progress in Oceanography*, 83: 361–368.
- FAO. 2006a. Capture production 1950–2004. FISHSTAT Plus—Universal Software for Fishery Statistical Time Series. FAO, Rome. [www.fao.org/fi/statist/FISOFT/FISHPLUS.asp](http://www.fao.org/fi/statist/FISOFT/FISHPLUS.asp).
- FAO. 2006b. Commodity trade and production 1976–2004. FISHSTAT Plus—Universal Software for Fishery Statistical Time Series. FAO, Rome. [www.fao.org/fi/statist/FISOFT/FISHPLUS.asp](http://www.fao.org/fi/statist/FISOFT/FISHPLUS.asp); or CD-ROM.
- Flores-de-Santiago, F. J., Santamaría-del-Ángel, E., González-Silvera, A., Martínez-Díaz-de-León, A., Millán-Núñez, R., and Kovacs, J. M. 2007. Assessing dynamics micro-regions in the Great Islands of the Gulf of California based on MODIS aqua imagery products. *Proceedings of the Society of Photo-Optical Instrumentation Engineers*, 6680, doi: 10.1117/12.732574.
- Galindo-Bect, M. S. 2003. Larvae and post-larvae of penaeid shrimp in the Upper Gulf of California and shrimp catches in relation to Colorado River flows. Doctoral Dissertation, University of Baja California, School of Marine Sciences and Oceanological Research Institute. 146 pp.
- Galindo-Bect, M. S., Glenn, E. P., Page, H. M., Fitzsimmons, K., Galindo-Bect, L. A., Hernández-Ayón, J. M., Petty, R. L., *et al.* 2000. Penaeid shrimp landings in the upper Gulf of California in relation to Colorado River freshwater discharge. *Fishery Bulletin US*, 98: 222–225.
- García-Juárez, A. R., Rodríguez-Domínguez, G., and Lluch-Cota, D. B. 2009. Blue shrimp (*Litopenaeus stylirostris*) catch quotas as a management tool in the upper Gulf of California. *Marine Science*, 35: 297–306.
- Glantz, H. M. 1992. Climate Variability, Climate Change, and Fisheries. Cambridge University Press, Cambridge, UK. 458 pp.
- Gillett, R. 2008. Global study of shrimp fisheries. FAO Fisheries Technical Paper, 475. 331 pp.
- González-Yañez, A. A., and Ortiz-Bultó, P. 2002. Seasonal relationship between climate and the relative abundance of *Farfantepenaeus notialis* pink shrimp in the Gulf of Ana Maria, Cuba. *Revista de Investigaciones Marinas*, 23: 97–104.
- Hernández-Ayón, J. M., Galindo-Bect, M. S., Flores-Báez, B. P., and Álvarez-Borrego, S. 1993. Nutrient concentrations are high in the turbid waters of the Colorado River delta. *Estuarine, Coastal and Shelf Science*, 37: 593–602.
- Li, J., and Clarke, A. J. 2005. Sea surface temperature and the brown shrimp (*Farfantepenaeus aztecus*) population on the Alabama, Mississippi, Louisiana and Texas continental shelves. *Estuarine, Coastal and Shelf Science*, 64: 261–266.
- López-Calderón, J., Martínez, A., González-Silvera, A., Santamaría-del-Ángel, E., and Millán-Núñez, R. 2008. Mesoscale eddies and wind variability in the northern Gulf of California. *Journal of Geophysical Research*, 113, C10001, doi:10.1029/2007JC004630.
- Mannino, A., Russ, M. E., and Hooker, S. B. 2008. Algorithm development and validation for satellite-derived distributions of DOC and CDOM in the US Middle Atlantic Bight. *Journal of Geophysical Research*, 113, C07051. doi:10.1029/2007JC004493.
- Millán-Núñez, R., Santamaría-del-Ángel, E., Cajal-Medrano, R., and Barocio-León, O. A. 1999. The Colorado River delta: a high primary productivity ecosystem. *Ciencias Marinas*, 25: 509–524.
- O'Reilly, J. E., Maritorena, S., O'Brien, M. C., Siegel, D. A., Toole, D., Mueller, J. L., Mitchell, B., *et al.* 2000. SeaWiFS Postlaunch Calibration and Validation Analyses, Part 3. NASA Technical Memorandum 2000-206892, 11. Ed. by S. B. Hooker, and E. R. Firestone. NASA Goddard Space Flight Center, Greenbelt, MD. 49 pp.
- Patt, F. S., Barnes, R. A., Eplee, R. E., Franz, B. A., Robinson, W. D., Feldman, G. C., Bailey, S. W., *et al.* 2003. Algorithm Updates for the Fourth SeaWiFS Data Reprocessing. NASA Technical Memorandum 2003-206892, 22. Ed. by S. B. Hooker, and E. R. Firestone. NASA Goddard Space Flight Center, Greenbelt, MD. 74 pp.
- SAGARPA. 2002. Shrimp fishery in the Mexican Pacific during the 2001–2002 season and criteria for the start of the ban in protected waters and marine waters. México, Secretary of Agriculture, Livestock, Rural Development, Fisheries and Food. National Commission of Aquaculture and Fisheries.
- SAGARPA. 2003. Analysis of the shrimp catch season 2002–2003 in the Mexican Pacific; criteria for the start of the ban in protected waters and marine waters. México, Secretary of Agriculture, Livestock, Rural Development, Fisheries and Food. National Commission of Aquaculture and Fisheries.
- SAGARPA. 2004a. National charter fishing. México, Secretary of Agriculture, Livestock, Rural Development, Fisheries and Food. National Commission of Aquaculture and Fisheries.
- SAGARPA. 2004b. Ban of the shrimp fishery in the Pacific coast. Department of Agriculture, Livestock, Rural Development, Fisheries and Food. National Commission of Aquaculture and Fisheries.
- SAGARPA. 2004c. Anuario estadístico de pesca 2003. México, Secretaría de Agricultura, Ganadería, Desarrollo Rural, Pesca y Alimentación. Comisión Nacional de Acuacultura y Pesca.
- SAGARPA. 2004d. Plan de manejo para la pesquería de camarón en el litoral del Océano Pacífico Mexicano. México, Secretaría de Agricultura, Ganadería, Desarrollo Rural, Pesca y Alimentación. Comisión Nacional de Acuacultura y Pesca.
- SAGARPA. 2005. Anuario estadístico de Pesca 2005. México, Secretaría de Agricultura, Ganadería, Desarrollo Rural, Pesca y Alimentación. Comisión Nacional de Acuacultura y Pesca.

- SAGARPA. 2006a. Análisis de las poblaciones de camarón durante la veda del 2006 en el litoral del pacífico mexicano México, Secretaría de Agricultura, Ganadería, Desarrollo Rural, Pesca y Alimentación. Comisión Nacional de Acuacultura y Pesca.
- SAGARPA. 2006b. Análisis de las poblaciones de camarón durante la veda del 2006 en el litoral del pacífico mexicano México, Secretaría de Agricultura, Ganadería, Desarrollo Rural, Pesca y Alimentación. Comisión Nacional de Acuacultura y Pesca.
- SAGARPA. 2007. Resultados de los muestreos de las poblaciones de camarón, durante la veda del 2007 en el litoral del Pacífico. México, Secretaría de Agricultura, Ganadería, Desarrollo Rural, Pesca y Alimentación. Comisión Nacional de Acuacultura y Pesca.
- SAGARPA. 2008. Resultados del análisis de las poblaciones de camarón del litoral del pacífico para implementar la veda durante el 2008. México, Secretaría de Agricultura, Ganadería, Desarrollo Rural, Pesca y Alimentación. Comisión Nacional de Acuacultura y Pesca.
- SAGARPA. 2009. Resultados del análisis de las poblaciones de camarón del litoral del pacífico para implementar la veda durante el 2009. México, Secretaría de Agricultura, Ganadería, Desarrollo Rural, Pesca y Alimentación. Comisión Nacional de Acuacultura y Pesca.
- Santamaría-del-Ángel, E., Alvarez-Borrego, S., and Müller-Karger, F. E. 1994a. Gulf of California biogeographic regions based on coastal zone color scanner imagery. *Journal of Geophysical Research*, 99: 7411–7421.
- Santamaría-del-Ángel, E., Alvarez-Borrego, S., and Müller-Karger, F. E. 1994b. The 1982–1984 *El Niño* in the Gulf of California as seen in coastal zone color scanner imagery. *Journal of Geophysical Research*, 99: 7423–7431.
- Santamaría-del-Ángel, E., Millan-Nunez, R., and De-la-Peña-Nettel, G. 1996. Effect of turbidity on primary productivity at two stations in the area of the Colorado River Delta. *Marine Sciences*, 22: 483–493.
- Secretaria de Pesca. 1986. Anuario Estadístico de Pesca 1986. Secretaria de Pesca, Álvaro Obregón No. 269 C.P. 06700 México D.F.
- Secretaria de Pesca. 1987. Anuario Estadístico de Pesca 1987. Secretaria de Pesca, Álvaro Obregón No. 269 C.P. 06700 México D.F.
- Secretaria de Pesca. 1988. Anuario Estadístico de Pesca 1988. Secretaria de Pesca, Álvaro Obregón No. 269 C.P. 06700 México D.F.
- Secretaria de Pesca. 1989. Anuario Estadístico de Pesca 1989. Secretaria de Pesca, Álvaro Obregón No. 269 C.P. 06700 México D.F.
- Stramska, M., and Stramski, D. 2005. Variability of particulate organic carbon concentration in the north polar Atlantic based on ocean color observations with Sea-viewing Wide Field-of-view Sensor (SeaWiFS). *Journal of Geophysical Research*, 110: C10018, doi:10.1029/2004JC002762.
